# Supplementary material for: NAK-associated protein 1/NAP1 activates TBK1 to ensure accurate mitosis and cytokinesis
Source: PubMed Central journal article supplement (PMC10702366; doi:10.1083/jcb.202303082), 2023-12-07

**Figure 1D**

Scramble control and TANK KD HeLa

Lane order for the blot:  
Scramble ShRNA    TANK KD ShRNA  
Async. Mitotic    Async. Mitotic

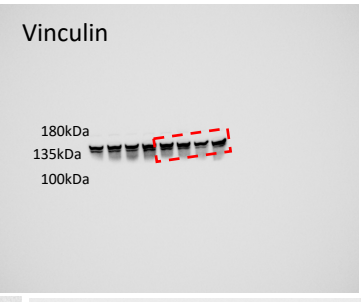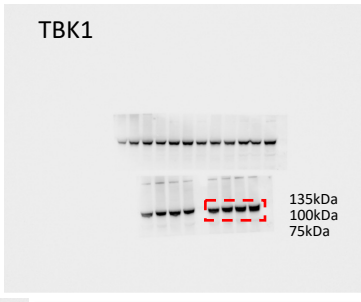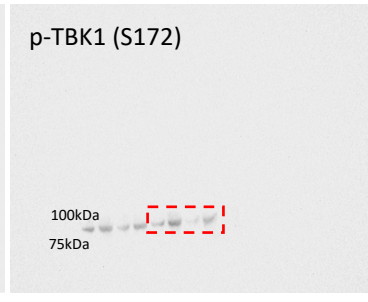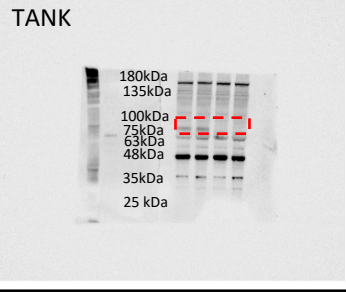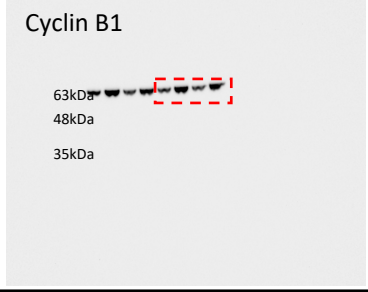

**Figure 1F**  
Scramble control and SINTBAD KD HeLa  
  
Lane order for the blot:  
Scramble ShRNA    SINTBAD ShRNA  
Async. Mitotic    Async. Mitotic

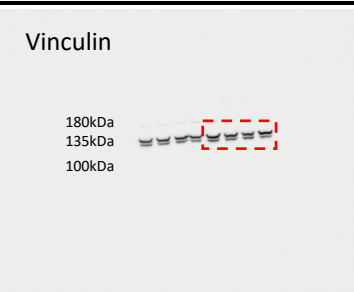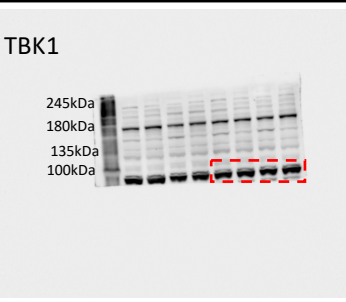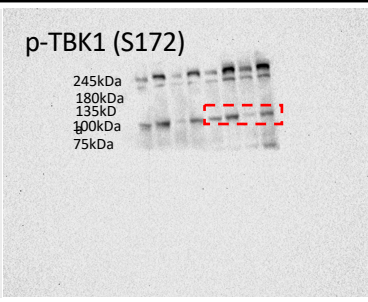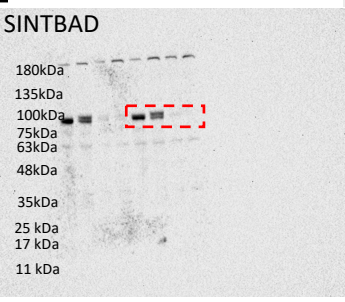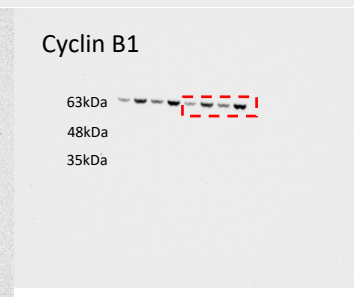

**Figure 1I**

Scramble control and NAP1 KD HeLa

Lane order for the blot:  
Scramble ShRNA    NAP1 ShRNA  
Async. Mitotic    Async. Mitotic

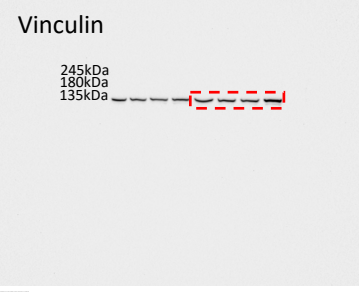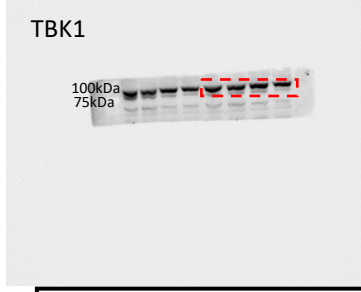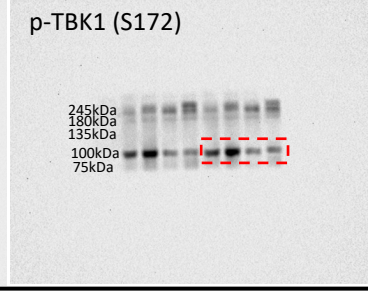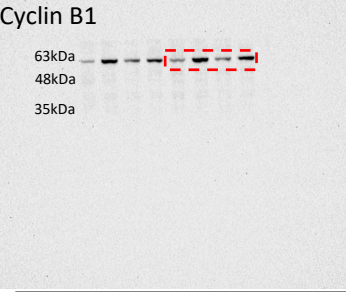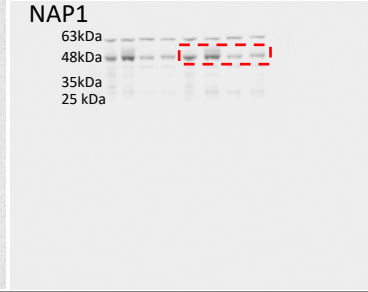

**Figure 1K**  
WT HeLa and Penta KO HeLa  
  
Lane order for the blot:  
WT HeLa    Penta KO HeLa  
Async. Mitotic    Async. Mitotic

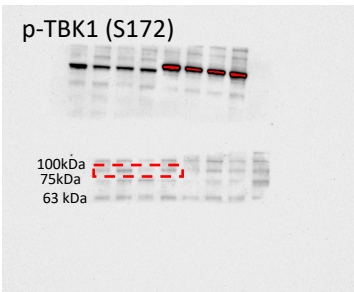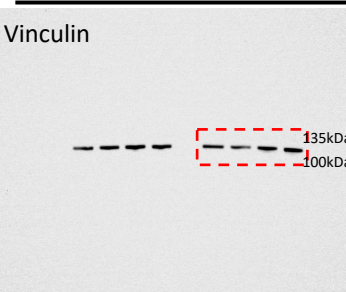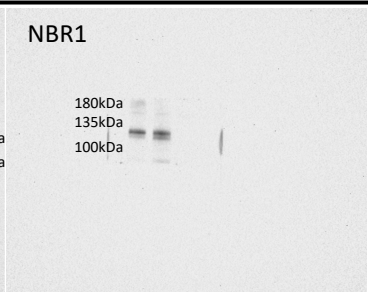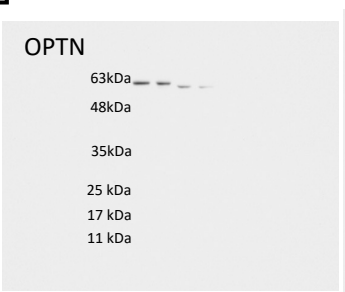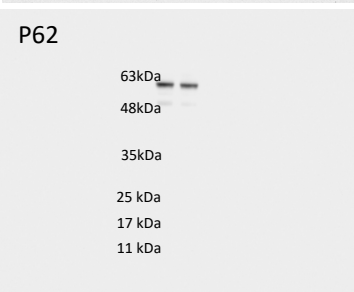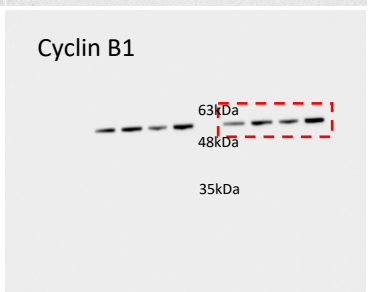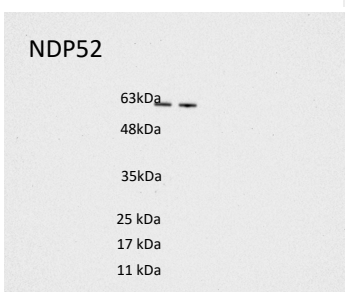

Supplement: JCB_202303082_SourceDataF1.pdf [file JCB_202303082_SourceDataF1.pdf]
