# Supplementary material for: NAK-associated protein 1/NAP1 activates TBK1 to ensure accurate mitosis and cytokinesis
Source: PubMed Central journal article supplement (PMC10702366; doi:10.1083/jcb.202303082), 2023-12-07

**Figure 4C**  
 Sample lane order for input and  
 WT GFP NAP1     $\Delta$  GFP NAP1  
 Async. Mitotic   Async. Mitotic

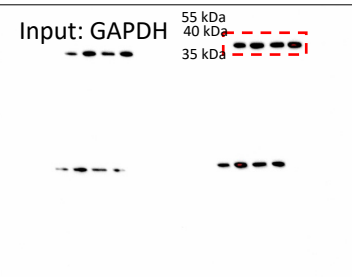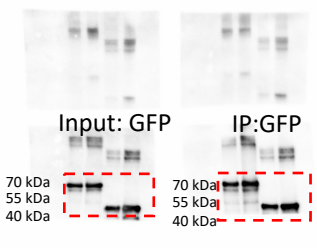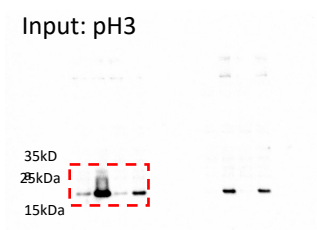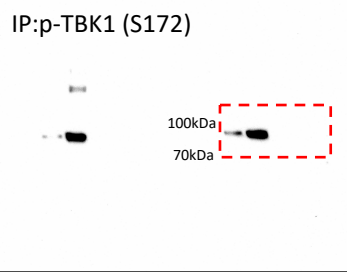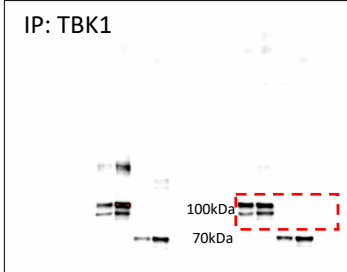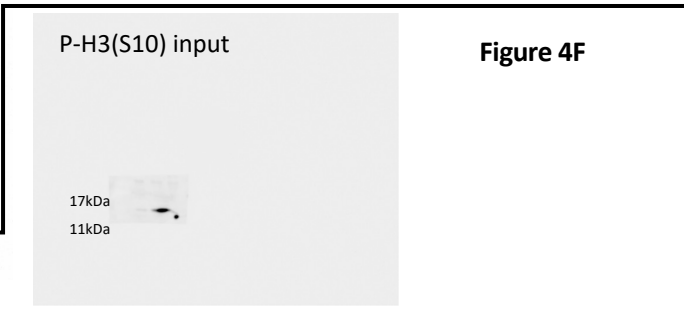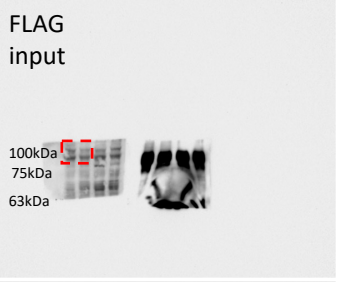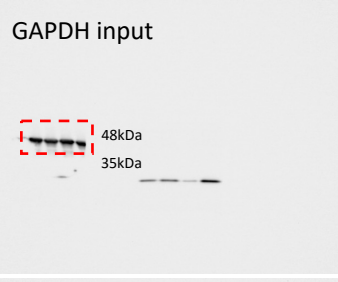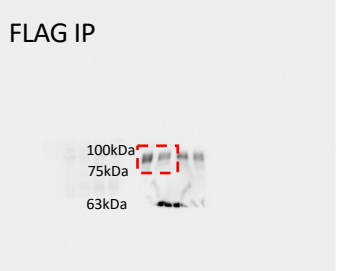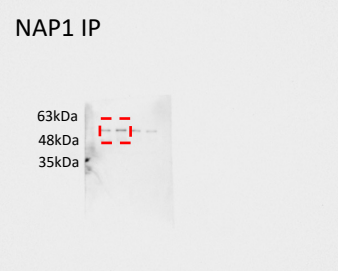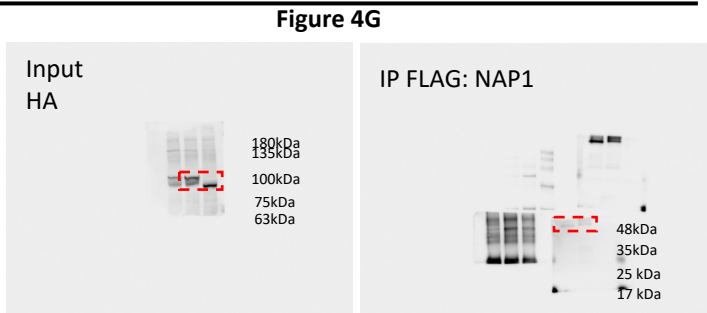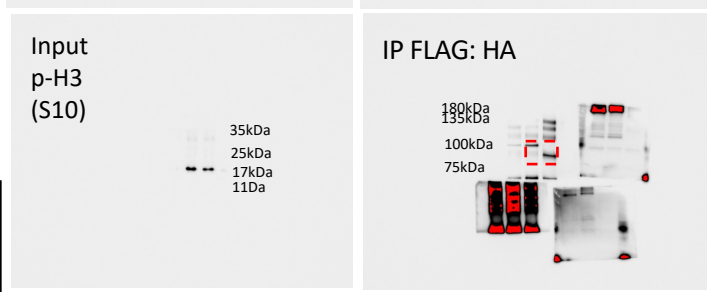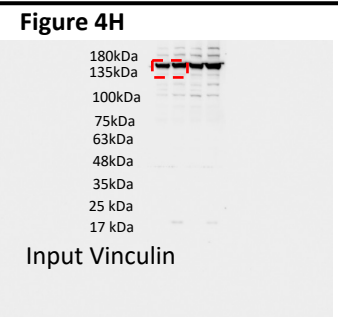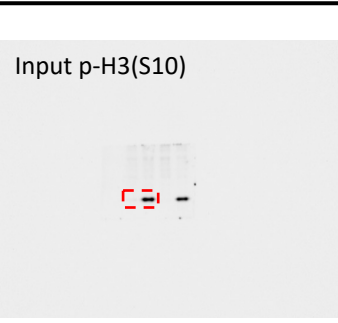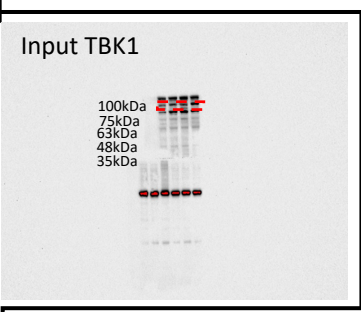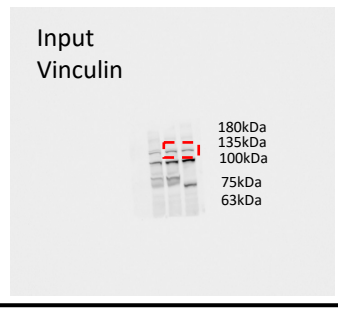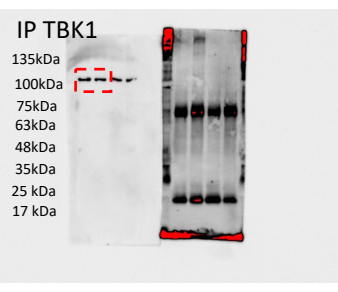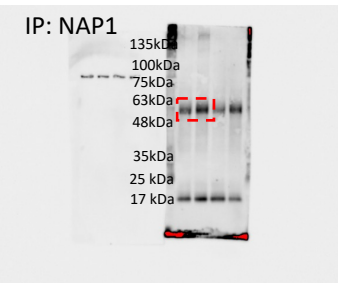

**Figure 4O**  
 Lane order  
 UT   2hrs dTAG   4hrs washed

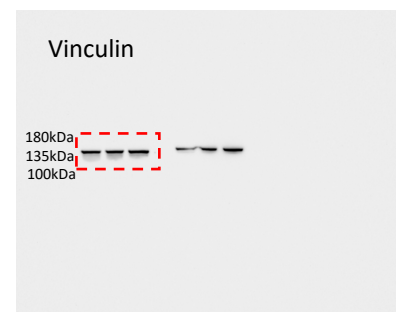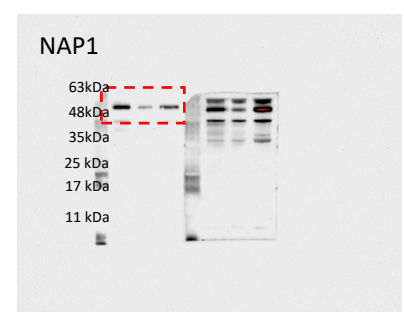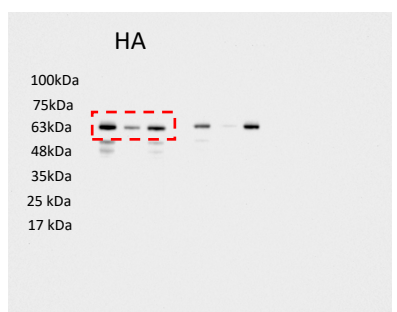

Supplement: JCB_202303082_SourceDataF4.pdf [file JCB_202303082_SourceDataF4.pdf]
