# Supplementary material for: NAK-associated protein 1/NAP1 activates TBK1 to ensure accurate mitosis and cytokinesis
Source: PubMed Central journal article supplement (PMC10702366; doi:10.1083/jcb.202303082), 2023-12-07

**Figure 5A**  
Lane order for RPE-1 samples  
G2 mitotic G1-Async.

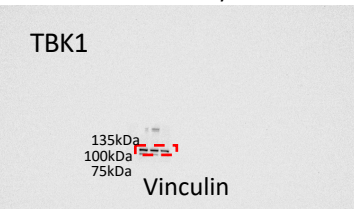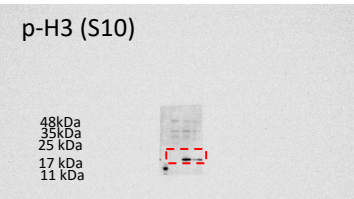

**Figure 5J**  
DLD-1 chloroquine treatment  
Lane order: UT T

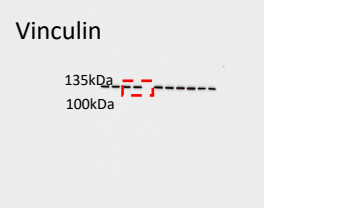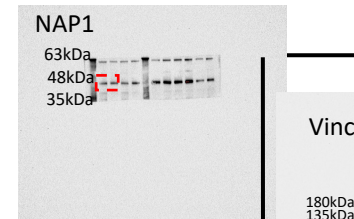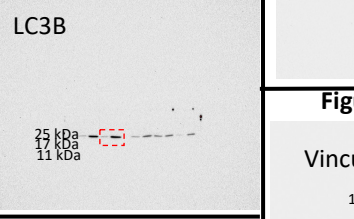

**Figure 5N**  
RPE-1 NAP1 level check in mitotic stages

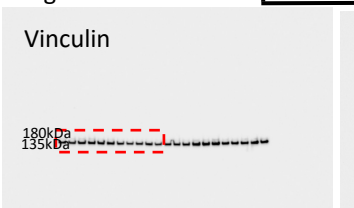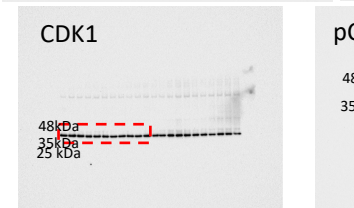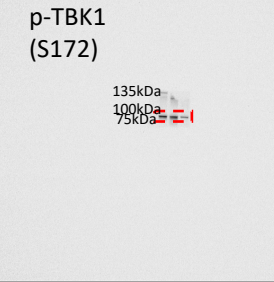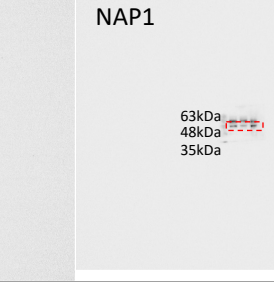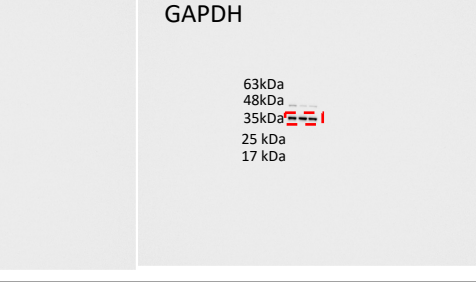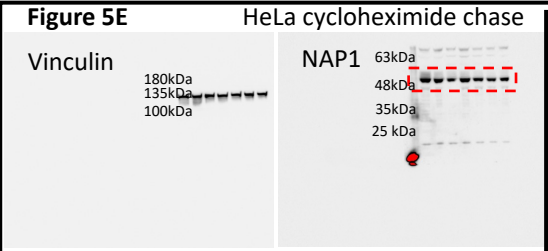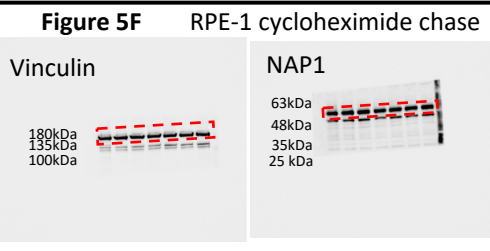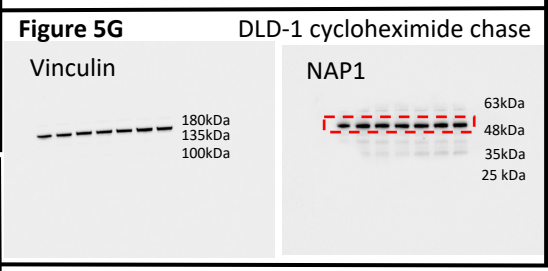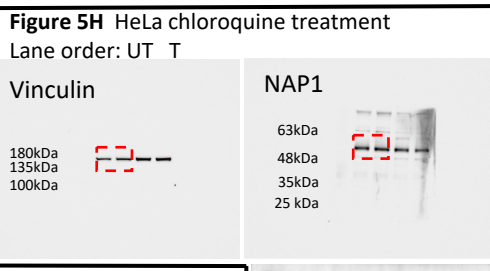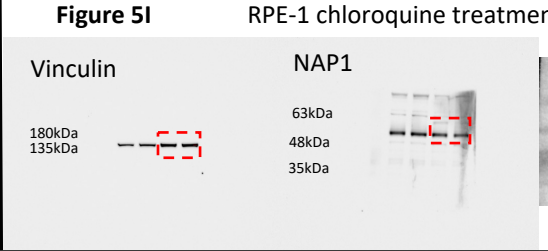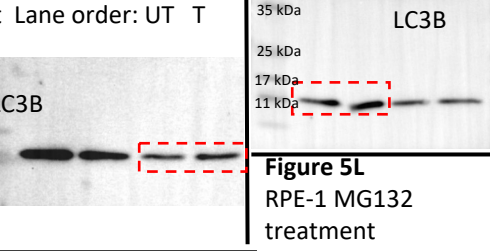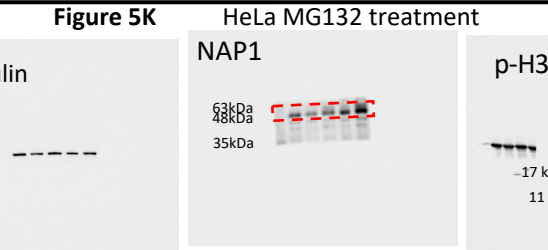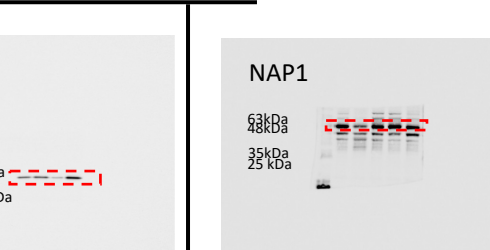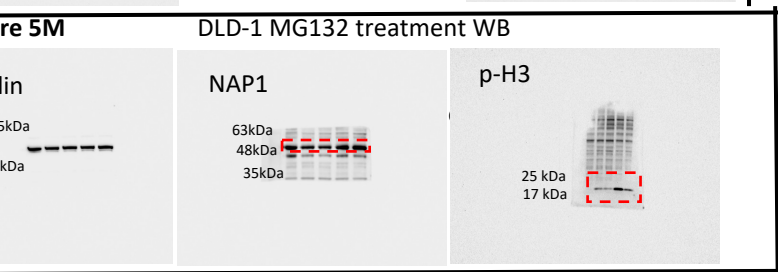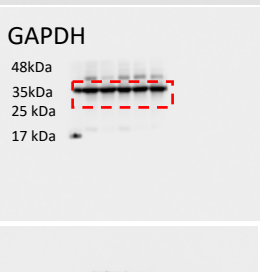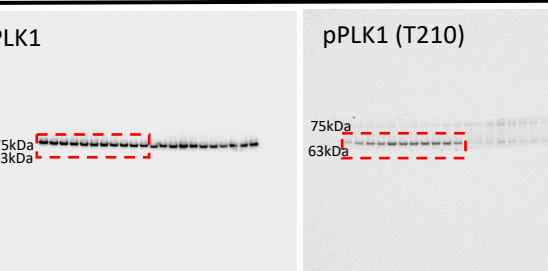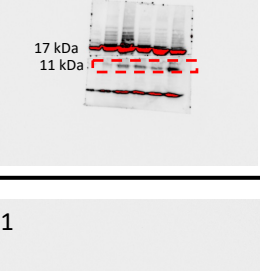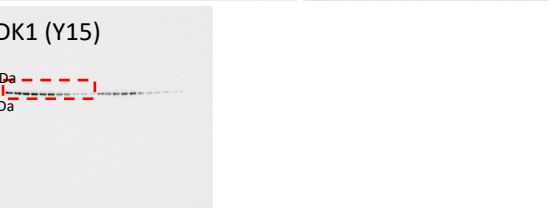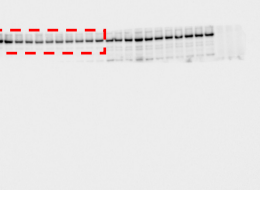

Supplement: JCB_202303082_SourceDataF5.pdf [file JCB_202303082_SourceDataF5.pdf]
