# Supplementary material for: NAK-associated protein 1/NAP1 activates TBK1 to ensure accurate mitosis and cytokinesis
Source: PubMed Central journal article supplement (PMC10702366; doi:10.1083/jcb.202303082), 2023-12-07

**Figure 2A**

WT and NAP1 KO HeLa

Lane order for the blot:

|                |                    |                    |
|----------------|--------------------|--------------------|
| <u>WT HeLa</u> | <u>NAP1 KO #10</u> | <u>NAP1 KO #12</u> |
| Async. Mitotic | Async. Mitotic     | Async. Mitotic     |

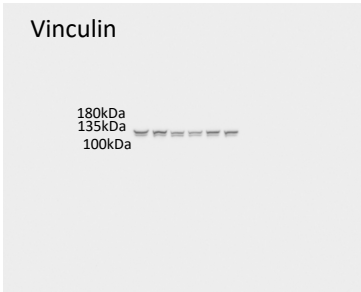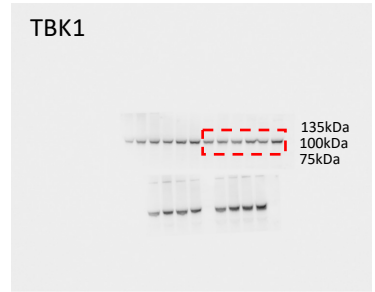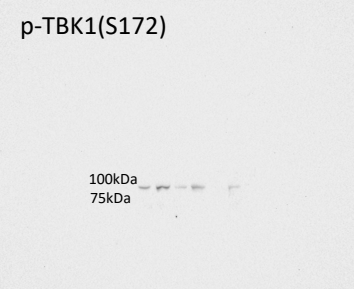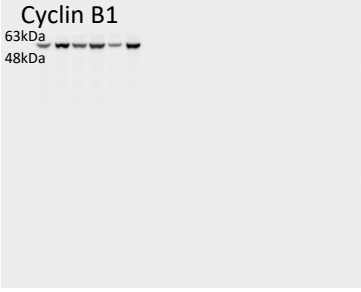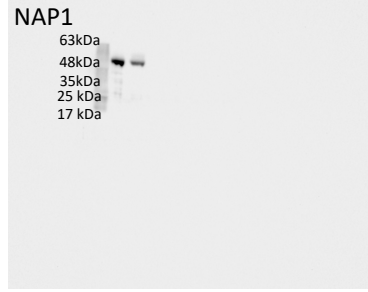

**Figure 2C**

WT and NAP1 KO and NAP1 Rescue HeLa

Lane order for the blot:

|                |                    |                       |
|----------------|--------------------|-----------------------|
| <u>WT HeLa</u> | <u>NAP1 KO #12</u> | <u>NAP1 KO rescue</u> |
| Async. Mitotic | Async. Mitotic     | Async. Mitotic        |

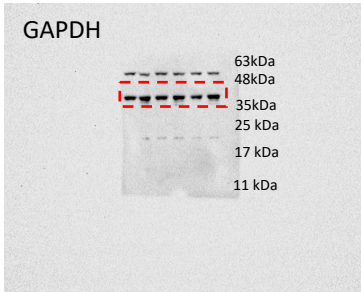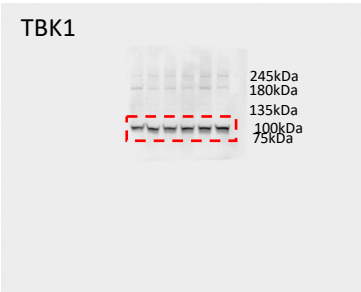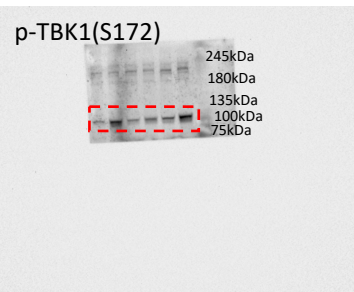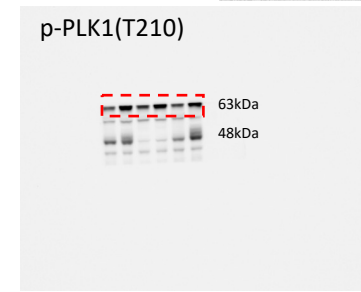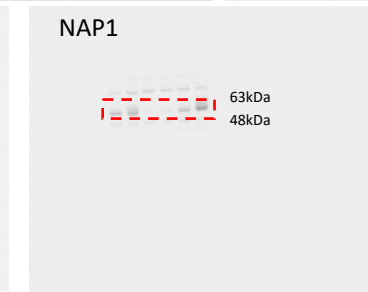

Supplement: JCB_202303082_SourceDataF2.pdf [file JCB_202303082_SourceDataF2.pdf]
