# Supplementary material for: NAK-associated protein 1/NAP1 activates TBK1 to ensure accurate mitosis and cytokinesis
Source: PubMed Central journal article supplement (PMC10702366; doi:10.1083/jcb.202303082), 2023-12-07

### Figure 3B

UT and dTAG T DLD-1

Lane order for the blot:

|           |         |               |         |
|-----------|---------|---------------|---------|
| <u>UT</u> |         | <u>dTAG T</u> |         |
| Async.    | Mitotic | Async.        | Mitotic |

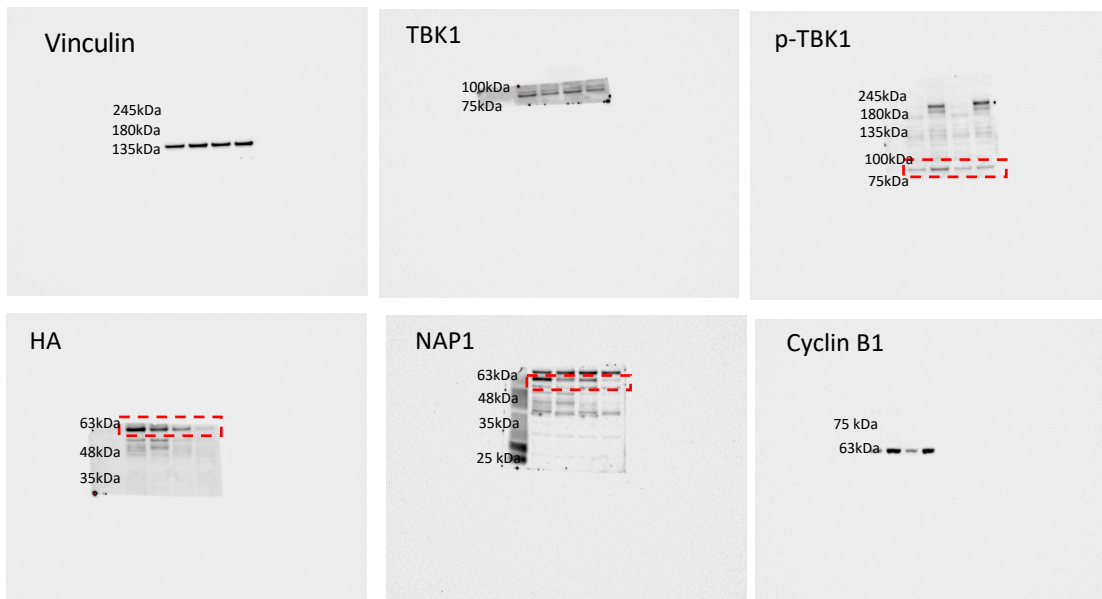

### Figure 3E

dTAG NAP1 20 hours treatment

Lane order for the blot:

dTAG NAP1 DLD-1  
UT 20hrs T

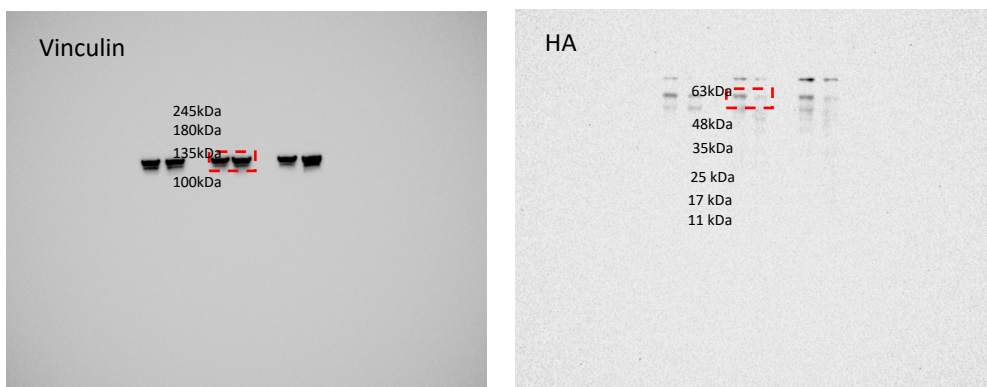

Supplement: JCB_202303082_SourceDataF3.pdf [file JCB_202303082_SourceDataF3.pdf]
