# Supplementary material for: NAK-associated protein 1/NAP1 activates TBK1 to ensure accurate mitosis and cytokinesis
Source: PubMed Central journal article supplement (PMC10702366; doi:10.1083/jcb.202303082), 2023-12-07

**Figure 6H**  
 Lane order for the blot:  
UT                      dTAG  
 Async. Mitotic      Async. Mitotic

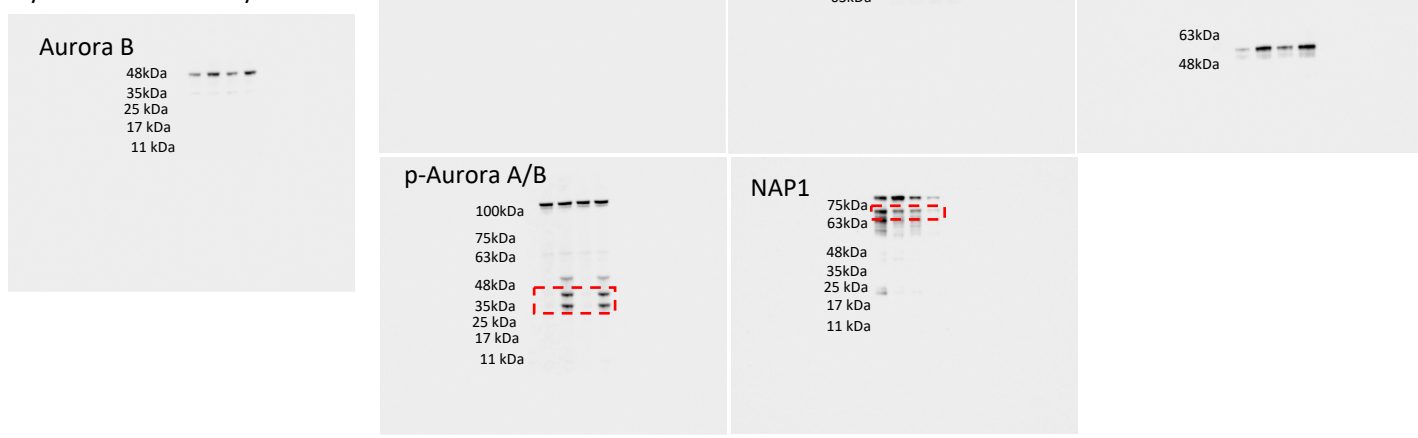

**Figure 6F**  
 Lane order for the blot:  
WT HeLa      TBK1 KO  
 Async. Mitotic      Async. Mitotic

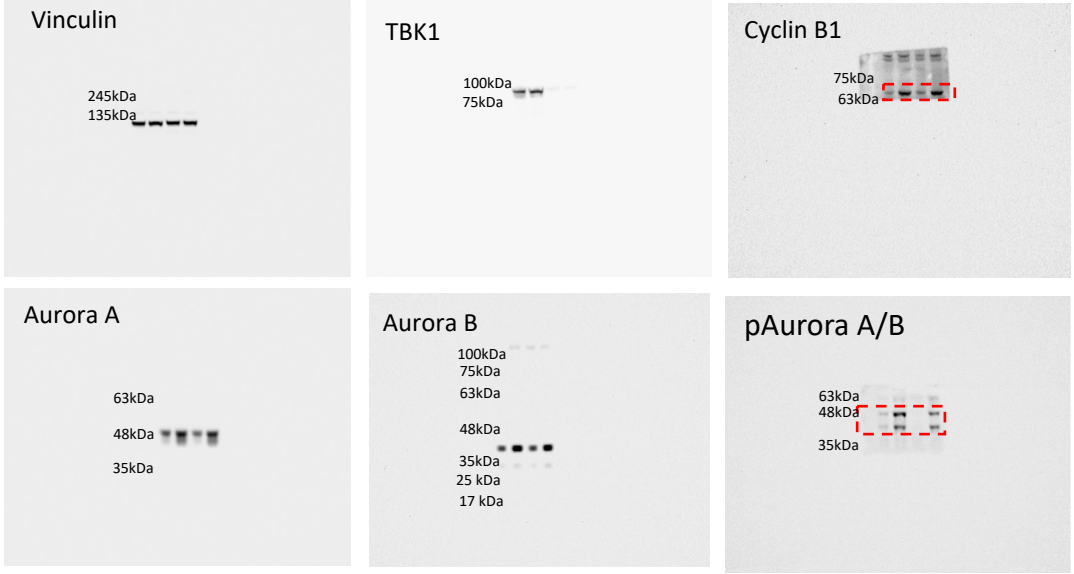

Supplement: JCB_202303082_SourceDataF6.pdf [file JCB_202303082_SourceDataF6.pdf]
