# Supplementary material for: NAK-associated protein 1/NAP1 activates TBK1 to ensure accurate mitosis and cytokinesis
Source: PubMed Central journal article supplement (PMC10702366; doi:10.1083/jcb.202303082), 2023-12-07
Supplement: JCB_202303082_SourceDataFS1.pdf [file JCB_202303082_SourceDataFS1.pdf]

Vinculin

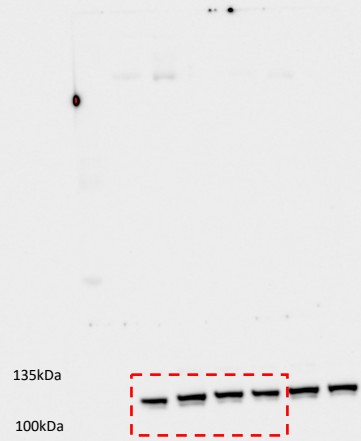

NAP1

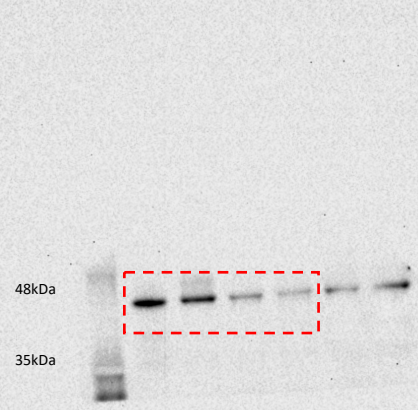

TBK1

100kDa  
75kDa

Western blot analysis of TBK1. Molecular weight markers are indicated at 100kDa and 75kDa. A red dashed box highlights a band at approximately 100kDa.

p-TBK1 (S172)

100kD  
a75kDa

Western blot analysis of p-TBK1 (S172). Molecular weight markers are indicated at 100kD and a75kDa. A red dashed box highlights a band at approximately 75kDa.

25 kDa

17 kDa  
11 kDa

Western blot analysis showing bands at 17 kDa and 11 kDa. A red dashed box highlights a band at approximately 17 kDa.

**NAP1 KD DLD-1**

Lane order for the blot:

Scramble ShRNA    NAP1 KD ShRNA

Async. Mitotic    Async. Mitotic

**Figure S1**
