# Supplementary material for: NAK-associated protein 1/NAP1 activates TBK1 to ensure accurate mitosis and cytokinesis
Source: PubMed Central journal article supplement (PMC10702366; doi:10.1083/jcb.202303082), 2023-12-07

**Figure S2F**

THP1

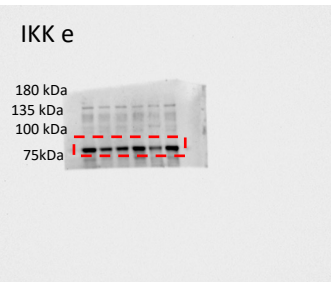

p-IKK e

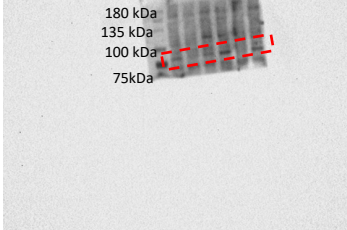

IRF-3

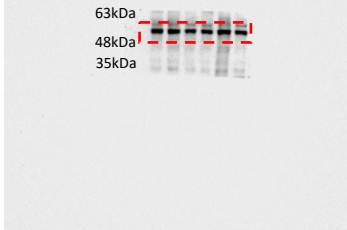

p-IRF3

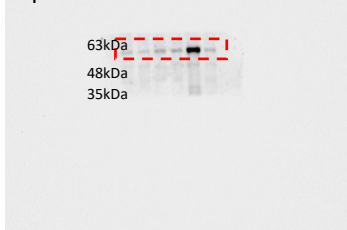**Figure S2A**

THP1 G1 G2 M

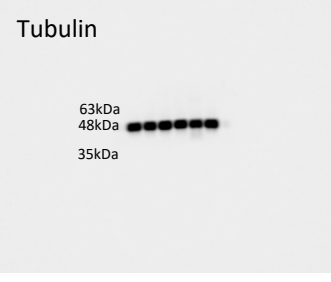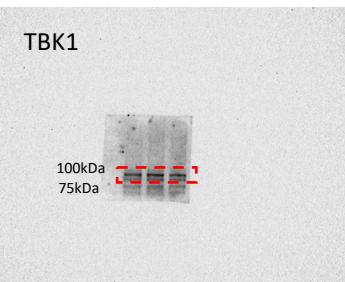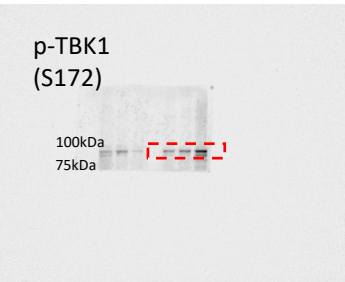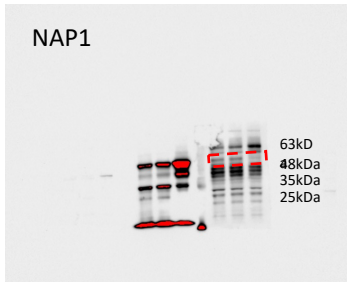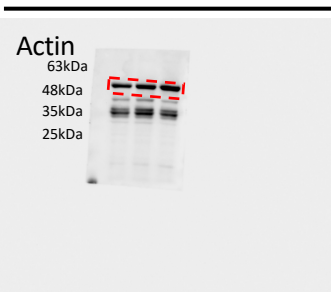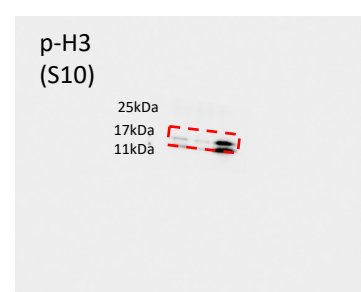**Figure S2B**

THP1 UT LPS Poly:I:C

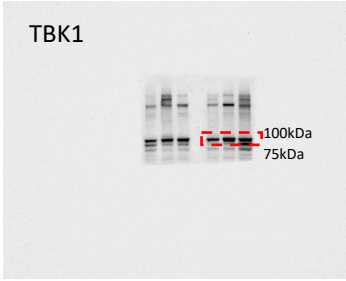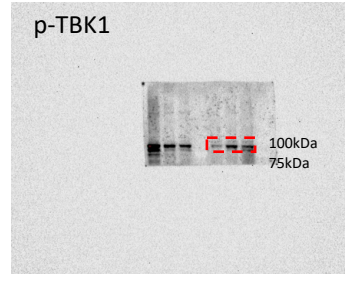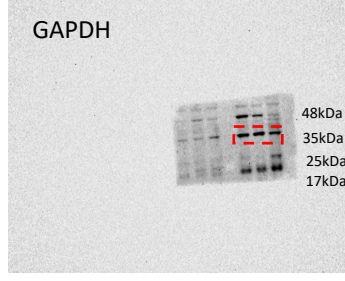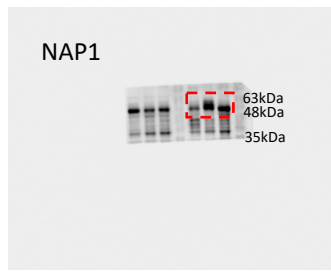

Supplement: JCB_202303082_SourceDataFS2.pdf [file JCB_202303082_SourceDataFS2.pdf]
